# Supplementary material
Source: PubMed Central journal article supplement (PMC1847776)
Supplement: NIHMS13422-supplement-T1.pdf [file NIHMS13422-supplement-T1.pdf]

**Supplementary Table 1** Effect of buffer composition on the rate of SRL cleavage by restrictocin under sub-saturating conditions.

| <b>Component added</b> | <b><math>k_{\text{obs}}</math> (<math>\text{s}^{-1} \cdot 10^{-3}</math>)</b> |
|------------------------|-------------------------------------------------------------------------------|
| -                      | 6.84                                                                          |
| 200 mM NaCl            | 0.028                                                                         |
| 200 mM KCl             | 0.031                                                                         |
| 40 mM EDTA(K)          | 0.114                                                                         |
| 40 mM Tris·HCl         | 1.67                                                                          |

Observed rate constants for restrictocin-catalyzed SRL cleavage were measured in buffer containing 10 mM Tris·HCl (pH 7.6), 50 mM KCl, 10 mM EDTA. Reactions contained < 1nM <sup>32</sup>P-labeled SRL and 1 μM restrictocin. A 5-fold excess of the buffer components relative to the standard buffer composition has been tested sequentially.
